# Supplementary material for: Direct comparison on the structural and optical properties of metal-catalytic and self-catalytic assisted gallium nitride (GaN) nanowires by chemical vapor deposition
Source: Royal Society of Chemistry journal article supplement (doi:10.1039/c4ra05388e), 2014-01-01
Supplement: c4ra05388e1.pdf [file c4ra05388e1.pdf]

### Supporting Information

Figure S1: Ni-catalyst assisted GaN NWs nanowires

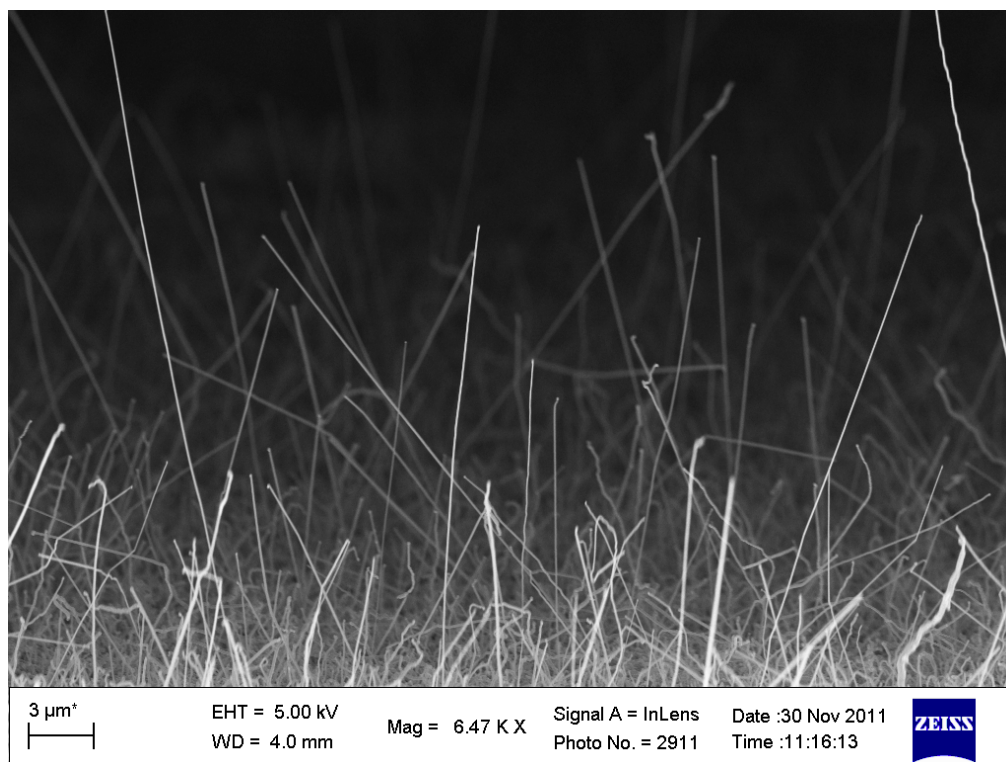

**Table S1** : The x-ray diffraction peak positions and their corresponding full width half maximum (FWHM) of dominant (100), (002) and (101) planes of GaN NWs

| GaN NWs                          | Ni-catalytic GaN NWs | Au-catalytic GaN NWs | Self-catalytic GaN NWs |
|----------------------------------|----------------------|----------------------|------------------------|
| GaN (100):                       |                      |                      |                        |
| Diffraction angle ( $2\theta$ )° | 32.77                | 32.50                | 32.75                  |
| FWHM (°)                         | 0.48                 | 0.70                 | 0.73                   |
| GaN (002):                       |                      |                      |                        |
| Diffraction angle ( $2\theta$ )° | 34.93                | 34.63                | 34.59                  |
| FWHM (°)                         | 0.54                 | 1.14                 | 1.17                   |
| GaN (101):                       |                      |                      |                        |
| Diffraction angle ( $2\theta$ )° | 37.17                | 36.84                | 36.96                  |
| FWHM (°)                         | 0.67                 | 1.02                 | 0.97                   |
